# Supplementary material
Source: publisher figshare collection journal article supplement (https://karger.figshare.com/ndownloader/files/37480747)
Supplement: Supplementary file 1 [file 37480747]

**Supplemental Table 1.**

| **Cartegory** | **Medication Name** | **ATC code** | | | | | | | |
| --- | --- | --- | --- | --- | --- | --- | --- | --- | --- |
| Anticholinergics | First-generation antihistamines |  |  |  |  |  |  |  |  |
| Brompheniramine | R06AB01 |  |  |  |  |  |  |  |
| Carbinoxamine | R06AA08 |  |  |  |  |  |  |  |
| Chrlorpheniramine | R06AB04 |  |  |  |  |  |  |  |
| Clemastine | R06AA04 |  |  |  |  |  |  |  |
| Cyproheptadine | R06AX02 |  |  |  |  |  |  |  |
| Dexbrompheniramine | R06AB06 |  |  |  |  |  |  |  |
| Dexchlorpheniramine | R06AB02 |  |  |  |  |  |  |  |
| Dimenhydrinate | R06AA11 |  |  |  |  |  |  |  |
| Diphenhydramine (oral) | R06AA02 | D04AA32 |  |  |  |  |  |  |
| Doxylamine | R06AA09 |  |  |  |  |  |  |  |
| Hydroxyzine | N05BB01 |  |  |  |  |  |  |  |
| Meclizine | A04AB04 | R06AE05 | R06AE |  |  |  |  |  |
| Promethazine | R06AD02 |  |  |  |  |  |  |  |
| Triprolidine | R06AX07 |  |  |  |  |  |  |  |
| Anti-parkinsonian agents |  |  |  |  |  |  |  |  |
| Benztropine (oral) | N04AC01 |  |  |  |  |  |  |  |
| Trihexyphenidyl | N04AA01 |  |  |  |  |  |  |  |
| Antispasmodics |  |  |  |  |  |  |  |  |
| Atropine (excludes ophthalmic) | A03BA01 |  |  |  |  |  |  |  |
| Belladonna alkaloids | A03BB | N02AA | A03BB01 | A03BB03 | N02AA01 | N02AA02 | N02AA05 | N02AA08 |
| Clidinium-Chlordiazepoxide | A03CA02 |  |  |  |  |  |  |  |
| Dicyclomine | A03AA07 |  |  |  |  |  |  |  |
| Hyoscyamine | A03BA03 |  |  |  |  |  |  |  |
| Propantheline | A03AB05 | A03AB | A03AB12 | A03AB18 | A03AB19 |  |  |  |
| Scopolamine | A04AD01 | N05CM05 |  |  |  |  |  |  |
| Antithrombotics | Dipyridamole | B01AC07 |  |  |  |  |  |  |  |
| Ticlopidine | B01AC05 |  |  |  |  |  |  |  |
| Anti-infective | Nitrofurantoin | J01XE01 |  |  |  |  |  |  |  |
| Cardiovascular | Peripheral alpha-1 blockers |  |  |  |  |  |  |  |  |
| Doxazosin | C02CA04 |  |  |  |  |  |  |  |
| Prazosin | C02CA01 |  |  |  |  |  |  |  |
| Terazosin | G04CA03 | G04CA | G04CA02 | G04CA04 |  |  |  |  |
| Central alpha agonists |  |  |  |  |  |  |  |  |
| Clonidine | C02LC01 |  |  |  |  |  |  |  |
| Guanabenz | none |  |  |  |  |  |  |  |
| Guanfacine | C02AC02 | C02AC | C02AC01 |  |  |  |  |  |
| Methyldopa | C02AB01 | C02AB |  |  |  |  |  |  |
| Reserpine | C02AA02 |  |  |  |  |  |  |  |
| Disopyramide | C01BA03 | C01BA | C01BA01 | C01BA02 |  |  |  |  |
| Dronedarone | C01BD07 |  |  |  |  |  |  |  |
| Digoxin | C01AA05 |  |  |  |  |  |  |  |
| Nifedipine (immediate release) | C08CA05 |  |  |  |  |  |  |  |
| Amiodarone | C01BD01 |  |  |  |  |  |  |  |
| Central Nervous System | Antidepressants |  |  |  |  |  |  |  |  |
| Amitriptyline | N06AA09 |  |  |  |  |  |  |  |
| Amoxapine | N06AA17 |  |  |  |  |  |  |  |
| Clomipramine | N06AA04 |  |  |  |  |  |  |  |
| Desipramine | N06AA01 |  |  |  |  |  |  |  |
| Doxepin | N06AA12 | D04AX01 |  |  |  |  |  |  |
| Imipramine | N06AA02 |  |  |  |  |  |  |  |
| Nortriptyline | N06AA10 |  |  |  |  |  |  |  |
| Paroxetine | N06AB05 |  |  |  |  |  |  |  |
| Protriptyline | N06AA11 |  |  |  |  |  |  |  |
| Trimipramine | N06AA06 |  |  |  |  |  |  |  |
| Barbiturates |  |  |  |  |  |  |  |  |
| Amobarbital | N05CA02 |  |  |  |  |  |  |  |
| Butabarbital | N05CB01 |  |  |  |  |  |  |  |
| Butalbital | N02BE71 |  |  |  |  |  |  |  |
| Mephobarbital | N03AA01 |  |  |  |  |  |  |  |
| Pentobarbital | N05CA01 |  |  |  |  |  |  |  |
| Phenobarbital | N03AB52 |  |  |  |  |  |  |  |
| Secobarbital | N05CA06 |  |  |  |  |  |  |  |
| Benzodiazepines |  |  |  |  |  |  |  |  |
| Short- and Intermediate-acting |  |  |  |  |  |  |  |  |
| Alprazolam | N05BA12 |  |  |  |  |  |  |  |
| Estazolam | N05CD04 |  |  |  |  |  |  |  |
| Lorazepam | N05BA06 |  |  |  |  |  |  |  |
| Oxazepam | N05BA04 |  |  |  |  |  |  |  |
| Temazepam | N05CD07 |  |  |  |  |  |  |  |
| Triazolam | N05CD05 |  |  |  |  |  |  |  |
| Long-acting |  |  |  |  |  |  |  |  |
| Clorazepate | N05BA05 |  |  |  |  |  |  |  |
| Chlordiazepoxide | N05BA02 |  |  |  |  |  |  |  |
| Clonazepam | N03AE01 |  |  |  |  |  |  |  |
| Diazepam | N05BA01 |  |  |  |  |  |  |  |
| Flurazepam | N05CD01 |  |  |  |  |  |  |  |
| Quazepam | N05CD10 |  |  |  |  |  |  |  |
| Meprobamate | N05BC01 |  |  |  |  |  |  |  |
| Nonbenzodiazepine, benzodiazepine receptor agonist hypnotics |  |  |  |  |  |  |  |  |
| Eszopiclone | N05CF04 |  |  |  |  |  |  |  |
| Zolpidem | N05CF02 |  |  |  |  |  |  |  |
| Zaleplon | N05CF03 |  |  |  |  |  |  |  |
| Ergoloid mesylates |  |  |  |  |  |  |  |  |
| Isoxsuprine | C04AA01 |  |  |  |  |  |  |  |
| Endocrine | Androgens |  |  |  |  |  |  |  |  |
| Methyltestosterone | G03BA02 | G03EK01 |  |  |  |  |  |  |
| Testosterone | G03EA02 |  |  |  |  |  |  |  |
| Desiccated thyroid | H03BB02 |  |  |  |  |  |  |  |
| Estrogens (with or without progresterone) | G03CA03 | G03FA01 | G03FA10 | G03FA11 | G03FA17 |  |  |  |
| Growth hormone | H01AC01 |  |  |  |  |  |  |  |
| Insulin | A10AD01 | A10AD04 | A10AD05 | A10AD06 |  |  |  |  |
| Megestrol | G03AC05 | G03DB02 | L02AB01 |  |  |  |  |  |
| Sulfonylureas (long-duration) |  |  |  |  |  |  |  |  |
| Chlorpropamide | A10BB02 |  |  |  |  |  |  |  |
| Glimepiride | A10BB12 |  |  |  |  |  |  |  |
| Glyburide | A10BB01 |  |  |  |  |  |  |  |
| Gastrointestinal | Metoclopramide | A03FA01 |  |  |  |  |  |  |  |
| Mineral oil (oral) | A06AA01 |  |  |  |  |  |  |  |
| Proton-pump inhibitors | A02BC01 | A02BC03 | A02BC04 | A02BC05 | A02BC08 |  |  |  |
| Pain Medications | Meperidine | N02AB02 |  |  |  |  |  |  |  |
| Non-cyclooxygenase-selective |  |  |  |  |  |  |  |  |
| NSAIDS (oral) |  |  |  |  |  |  |  |  |
| Aspirin | A01AD05 | N02BA01 |  |  |  |  |  |  |
| Diflunisal | N02BA11 |  |  |  |  |  |  |  |
| Etodolac | M01AB08 |  |  |  |  |  |  |  |
| Fenoprofen | M01AE04 |  |  |  |  |  |  |  |
| Ibuprofen | M01AE01 | M01AE | M01AE02 | M01AE09 | M01AE11 |  |  |  |
| Ketoprofen | M01AE03 | M02AA10 |  |  |  |  |  |  |
| Meclofenamate | M01AG04 | M02AA18 |  |  |  |  |  |  |
| Mefenamic acid | M01AG01 |  |  |  |  |  |  |  |
| Meloxicam | M01AC06 |  |  |  |  |  |  |  |
| Nabumetone | M01AX01 | M01AX |  |  |  |  |  |  |
| Naproxen | G02CC02 |  |  |  |  |  |  |  |
| Oxaprozin | M01AE12 |  |  |  |  |  |  |  |
| Piroxicam | M01AC01 | M02AA07 | M01AC |  |  |  |  |  |
| Sulindac | M01AB02 |  |  |  |  |  |  |  |
| Tolmetin | M01AB03 | M02AA21 |  |  |  |  |  |  |
| Indomethacin | M01AB01 | M02AA23 |  |  |  |  |  |  |
| Ketorolac | M01AB15 | S01BC05 |  |  |  |  |  |  |
| Pentazocine | N02AD01 |  |  |  |  |  |  |  |
| Skeletal muscle relaxants |  |  |  |  |  |  |  |  |
| Carisoprodol | M03BA02 |  |  |  |  |  |  |  |
| Chlorzoxazone | M03BB03 |  |  |  |  |  |  |  |
| Cyclobenzaprine | M03BX08 |  |  |  |  |  |  |  |
| Metaxalone | none |  |  |  |  |  |  |  |
| Methocarbamol | M03BA03 |  |  |  |  |  |  |  |
| Orphenadrine | N04AB02 |  |  |  |  |  |  |  |
| Genitourinary | Desmopressin | H01BA02 |  |  |  |  |  |  |  |
